1 Evolution, not transgenerational plasticity, explains the divergence of acorn ant thermal tolerance  
2 across an urban-rural temperature cline

3

4 Ryan A. Martin<sup>\*</sup>, Lacy D. Chick<sup>1</sup>, Aaron R. Yilmaz, Sarah E. Diamond<sup>\*</sup>

5 Department of Biology, Case Western Reserve University, Cleveland, Ohio 44106

6 <sup>1</sup> current address: The Holden Arboretum, Kirtland, Ohio 44094

7 <sup>\*</sup> correspondence to [ryan.a.martin@case.edu](mailto:ryan.a.martin@case.edu) and [sarah.diamond@case.edu](mailto:sarah.diamond@case.edu)

8

9

10 Running head: Testing for transgenerational plasticity

11 Authors' contributions. R.A.M. and S.E.D. designed the study, analyzed the data and wrote the  
12 first draft of the manuscript. All authors collected data and contributed to revisions.

13 Acknowledgements. The Squire Valleevue and Valley Ridge Farm and the Holden Forests and  
14 Gardens provided access to field sites. M. Moore provided helpful comments. An Oglebay Fund  
15 grant provided financial support.

16 Data Accessibility Statement: Data will be deposited to Dryad upon acceptance.

17

18

19

20 **Abstract**

21 Disentangling the mechanisms of phenotypic shifts in response to environmental change is  
22 critical, and although studies increasingly disentangle phenotypic plasticity from evolutionary  
23 change, few explore the potential role for transgenerational plasticity in this context. Here, we  
24 evaluate the potential role that transgenerational plasticity plays in phenotypic divergence of  
25 acorn ants in response to urbanization. F2 generation worker ants (offspring of lab-born queens)  
26 exhibited similar divergence among urban and rural populations as F1 generation worker ants  
27 (offspring of field-born queens) indicating that evolutionary differentiation rather than  
28 transgenerational plasticity was responsible for shifts towards higher heat tolerance and  
29 diminished cold tolerance in urban acorn ants. Hybrid matings between urban and rural  
30 populations provided further insight into the genetic architecture of thermal adaptation. Heat  
31 tolerance of hybrids more resembled the urban-urban pure type, whereas cold tolerance of  
32 hybrids more resembled the rural-rural pure type. As a consequence, thermal tolerance traits in  
33 this system appear to be influenced by dominance rather than being purely additive traits, and  
34 heat and cold tolerance might be determined by separate genes. Though transgenerational  
35 plasticity does not explain divergence of acorn ant thermal tolerance, its role in divergence of  
36 other traits and across other urbanization gradients merits further study.

37

38 *Keywords:* adaptation, maternal effect, thermal physiology, global change, speciation

39

40

## 41 **Introduction**

42 Responses to changing environments can occur either through evolutionary change or through  
43 existing phenotypic plasticity (Diamond and Martin 2016). However, the mechanisms underlying  
44 observed phenotypic responses to rapid environmental changes, including through anthropogenic  
45 effects are largely unknown for most organisms, as distinguishing plastic from evolved responses  
46 is often challenging (Merilä and Hendry 2014). Indeed, while the dichotomy between purely  
47 plastic and purely evolutionary responses is important and real, the two mechanisms can interact  
48 and influence each other (Ghalambor et al. 2007; Diamond and Martin 2016; Kelly 2019). This  
49 more complex view posits that along with the concept that plasticity itself evolves (DeWitt and  
50 Scheiner 2004), plastic responses to novel environments may often precede and shape the speed,  
51 direction, and magnitude of evolutionary change, thereby facilitating adaptation (*i.e.*, *plasticity-*  
52 *first hypothesis* or *genetic accommodation*; for theoretical considerations, see Price et al. 2003;  
53 West-Eberhard 2003; Levis and Pfennig 2016, and for empirical examples, see Corl et al. 2018;  
54 Levis et al. 2018). Transgenerational effects—the influence of parents on the phenotype of their  
55 offspring independent from the effects of genetic inheritance (Bernardo 1996; Mousseau and Fox  
56 1998; Marshall and Uller 2007)—may be especially effective in facilitating adaptive evolution to  
57 novel environments, as parents can alter offspring development in anticipation of the  
58 environment they will later experience (Badyaev 2008). Despite this promise, there are few  
59 examples of transgenerational plasticity facilitating evolution in response to the altered selective  
60 regimes of novel environments (Badyaev et al. 2002a,b, Pfennig and Martin 2009, 2010).

61 Cities are an emerging experimental model system for studying plastic and evolutionary  
62 responses to rapid anthropogenic change (Rivkin et al. 2019), and a number of studies find  
63 evidence that populations are indeed evolving in response to selective pressures associated with

64 urbanization over contemporary timescales (Johnson and Munshi-South 2017). For example,  
65 research suggests that urban populations of the Puerto Rican Crested Anole, (*Anolis cristatellus*)  
66 have evolved longer limbs and increased toe pad lamellae in response to selection for locomotor  
67 performance on artificial surfaces (Winchell et al. 2016). This and other studies have also found  
68 considerable within generational phenotypic plasticity in response to urban environments (e.g.,  
69 Diamond et al. 2017, 2018a; Gorton et al. 2018). However, evaluating if transgenerational  
70 plasticity contributes to divergence in urban habitats has not yet been explored.

71 A classic approach for disentangling plastic responses occurring both within and across  
72 generations from evolved responses is to compare field phenotypic measures between  
73 populations with those from individuals of the same populations bred and reared in a controlled,  
74 shared environment (i.e., a common garden experiment) across multiple generations (Merilä and  
75 Hendry 2014; Donihue and Lambert 2015). By controlling for environmental differences across  
76 populations in the common garden, researchers can isolate the genetic component, if any, of the  
77 phenotypic divergence measured in the field. Although this approach is conceptually simple,  
78 such experiments are often labor intensive and time consuming, and might be challenging or  
79 impossible for species that are difficult to rear and breed in the lab (Donelson et al. 2018).  
80 Consequently, most urban evolution studies to date have only reared field-caught juveniles or a  
81 single generation in the lab and as a result cannot fully disentangle transgenerational phenotypic  
82 plasticity from within generation plasticity and purely genetic divergence (but see Brans et al.  
83 2017).

84 Here we use a laboratory common garden experiment with a multi-generational breeding  
85 design to test for the presence of transgenerational plasticity and also investigate the genetic  
86 architecture underlying evolutionary divergence between urban and rural populations of the

87 acorn ant (*Temnothorax curvispinosus*). We focus on thermal tolerance traits (heat and cold  
88 tolerance) and their response to urban heat island effects along the urbanization gradient of  
89 Cleveland Ohio, USA. F1 offspring (lab-born workers of field-caught queens) of urban acorn ant  
90 populations reared under common garden exhibit increased heat tolerance and diminished cold  
91 tolerance compared with rural populations; this pattern of differentiation among urban and rural  
92 acorn ant populations is apparent for geographically isolated cities, including Cleveland, Ohio  
93 and Knoxville, Tennessee (Diamond et al. 2017, 2018a). Moreover, in both cities we found that  
94 urban colonies produced more alates (*i.e.*, reproductive offspring) under typical urban rearing  
95 temperatures, and rural colonies produced more alates when reared at typical rural rearing  
96 temperatures, resulting in fitness tradeoffs across environments for each population (Diamond et  
97 al. 2018a). These results strongly suggest that *T. curvispinosus* has adaptively evolved to the  
98 warmer environmental temperatures of the urban environment (*i.e.*, the urban heat island effect).  
99 However our design could not detect or rule out transgenerational plasticity as a mechanism  
100 behind this adaptive divergence.

101 In this study, we tested the heat and cold tolerance of F2 offspring, lab-born workers of  
102 lab-born queens. We tested the offspring of pure-type rural population matings, pure-type urban  
103 population matings, and hybrids, both where the female was from the rural population and the  
104 male from the urban population and vice versa. If transgenerational plasticity were responsible  
105 for the increased heat tolerance and diminished cold tolerance we documented previously in  
106 urban population acorn ants, then we would expect these phenotypic differences to disappear in  
107 the F2 offspring comparisons of pure-type urban and rural populations. If transgenerational  
108 plasticity plays only a minor to no role, we would expect the increased heat tolerance and  
109 diminished cold tolerance of pure-type urban populations relative to rural populations to remain

110 in the F2 offspring. The hybrid matings further evaluate the role of transgenerational plasticity,  
111 where parental effects should differentially affect hybrid offspring depending on the direction of  
112 the urban-rural mating. Additionally, comparisons among and against the hybrid tolerance  
113 phenotypes allowed us to gain further insight into the genetic architecture underlying heat and  
114 cold tolerance. For example, these comparisons allowed us to distinguish a purely additive  
115 genetic model of trait inheritance from alternatives, such as dominance or transgressive  
116 segregation.

117

## 118 **Materials and Methods**

### 119 *Colony collections*

120 We collected queenright (queen present) acorn ant (*Temnothorax curvispinosus*) colonies  
121 in early summer 2017 (6 June 2017 – 21 July 2017) from urban and rural sites across Cleveland,  
122 Ohio (42°N latitude). To identify urban and rural sites, we used percent developed impervious  
123 surface area (ISA) (Imhoff et al. 2010), such that urban sites were categorized as 40-50% ISA,  
124 and rural sites were categorized as 0% ISA (see Table S1 for site details).

125

### 126 *Mating design and common garden rearing*

127 We returned field-caught colonies to the lab and placed them under conditions to  
128 facilitate the production of male and female alates (or winged, sexual individuals), including a  
129 warm, diurnally fluctuating thermal regime (30 °C daytime, and 26 °C nighttime temperature)  
130 synced with a 14:10 short-day photoperiod (following Stuart et al. 1993; Percival 36-VL growth  
131 chambers). Each colony was maintained individually in a 120 mL plastic cup. Resource tubes  
132 with sugar water (25% solution) and plain tap water were provided to colonies along with a

133 continuous supply of dead mealworms. Once alates were produced within the colonies, we  
134 paired males and females in four mating crosses, including two pure-type matings, rural-rural  
135 and urban-urban and two hybrid matings, rural-urban (with the maternal source population listed  
136 first) and urban-rural. Because acorn ants are suggested to have male-biased dispersal (Stuart et  
137 al. 1993), we provided several female alates (typically 5 alates) from the same colony with males  
138 from several different colonies (typically 10 alates, all of which were distinct from the female  
139 alate source colony). We enclosed alates from each cross in separate glass aquaria (38 L  
140 capacity) with a mesh netting top. Alates were provided with the same resources as their source  
141 colonies, including water and sugar tubes plus dead mealworms. We provided alates with several  
142 uninhabited, hollowed-out acorns that we had sliced horizontally and held together with garden  
143 twine. This allowed us to check on the mating status of the paired alates, specifically whether the  
144 ants had shed their wings (an indication that they have mated, (Herbers 1990) and whether mated  
145 female alates began to lay eggs. All mated females began new egg production by 7 December  
146 2017.

147         Once mated female alates began to produce eggs, we placed these newly established  
148 colonies individually within 120 mL plastic cups and provided them with water and sugar  
149 resource tubes and dead mealworms. We held these colonies at 25 °C (on a 14:10 photoperiod),  
150 as this is the optimal temperature for brood development (Diamond et al. 2013). After the newly  
151 laid eggs developed into workers, we tested the thermal tolerance of these workers (*i.e.*, the  
152 second generation of acorn ant workers reared entirely within the laboratory environment).

153

154 *Thermal tolerance*

155 We used a dynamic temperature ramping protocol to assess the critical thermal maximum  
156 and minimum ( $CT_{\max}$  and  $CT_{\min}$ ), each defined as the loss of muscular coordination, which yield  
157 ecologically relevant limits on performance and serve as our measures of heat and cold tolerance  
158 (Terblanche et al. 2011). We tested workers individually for either  $CT_{\max}$  or  $CT_{\min}$ , as the  
159 assessment of thermal tolerance is a semi-destructive process that precludes assessment of both  
160  $CT_{\max}$  and  $CT_{\min}$  on the same individual. Ants were placed individually into 1.5 mL Eppendorf  
161 tubes with a cotton plug in the lid. Temperatures were manipulated using a dry block incubator  
162 (Boekel Scientific Tropicooler), and increased or decreased at a rate of  $1\text{ }^{\circ}\text{C min}^{-1}$ . Initial  
163 temperature for the estimation of  $CT_{\max}$  was  $34\text{ }^{\circ}\text{C}$ , and was  $16\text{ }^{\circ}\text{C}$  for  $CT_{\min}$ . These starting  
164 temperatures lie outside the range needed to induce loss of muscular coordination or death.

165 Thermal tolerances were assessed between 30 August 2018 and 2 September 2018. We  
166 tested a total of 487 individuals for thermal tolerance, 251  $CT_{\max}$ , 236  $CT_{\min}$  from 18 different  
167 colonies. For the pure mating types, we had four urban-urban colonies and four rural-rural  
168 colonies. For the hybrid mating types, we had five urban-rural (with the origin of the maternal  
169 population listed first) colonies and five rural-urban colonies. The number of individuals tested  
170 per colony (and within each tolerance type, heat or cold tolerance) ranged from 5 to 24 with a  
171 mean and SD of 13.6 and 5.17 (see also Table S2).

172

### 173 *Statistical analyses*

174 We fit linear mixed effects models with either  $CT_{\max}$  or  $CT_{\min}$  as the response variable  
175 and the type of mating (the two pure types, urban-urban and rural-rural, and the two hybrid types  
176 with the population origin of the mother listed first, urban-rural and rural-urban) as a predictor  
177 variable (treated as a categorical variable with four levels). We used the *lme* function from the



178 *nlme* library in R (Pinheiro et al. 2018; R Core Team 2018) to perform these models. Colony  
179 identity was included as a random intercept in each model to account for autocorrelation among  
180 individuals from the same colony. The statistical significant of mating type was assessed using  
181 likelihood ratio tests. Post-hoc analyses to assess the significant differences between factor levels  
182 of the type of mating predictor variable were performed using the *emmeans* function (from the  
183 eponymous library) with all pairwise comparisons (Lenth 2018).

184 To model tolerance breadth (the difference between colony-mean  $CT_{\max}$  and colony-  
185 mean  $CT_{\min}$ ), we fit a generalized linear model with tolerance breadth as the response and type of  
186 mating as a predictor. We modeled tolerance breadth using a Gaussian probability distribution  
187 and log link function owing to skew in the untransformed data. Because hybrid tolerance  
188 responses were indistinguishable from one another, and because we were more limited in  
189 statistical power after computing colony-level means for heat and cold tolerance, we fit a  
190 subsequent model wherein each of the pure types (urban-urban and rural-rural) were compared  
191 with the hybrid types (considered as a single group). We performed the post-hoc analysis on this  
192 model. Although a strict test of maternal effects would involve comparisons of the urban  
193 maternal pairings versus rural pairings, our initial analyses showed little evidence of maternal  
194 effects (see below), so we used the particular analyses for thermal tolerance breadth to explore  
195 the genetic architecture underlying heat versus cold tolerance, and hence justified our combining  
196 of offspring results for the hybrid matings.

197

## 198 **Results**

199 We found no evidence that the evolutionary differentiation in heat and cold tolerance  
200 among urban and rural acorn ant populations was driven by transgenerational plasticity.

201 Likelihood ratio tests for the effect of mating type on heat tolerance and cold tolerance were  
202 statistically significant ( $CT_{\max}$ :  $\chi^2 = 44.6$ ;  $P = 1.12E-09$ ;  $df = 3$ ;  $CT_{\min}$ :  $\chi^2 = 20$ ;  $P = 0.00017$ ;  $df =$   
203 3). Post-hoc tests revealed that F2 offspring of male and female reproductives born, reared, and  
204 mated within the lab environment exhibited significantly elevated heat tolerance and  
205 significantly diminished cold tolerance in urban-urban crosses as compared with rural-rural  
206 crosses (Table 1, Fig. 1).

207 The results of the hybrid pairings (female-male) urban-rural and rural-urban revealed  
208 further insights into the contemporary evolution of thermal tolerance traits in response to  
209 urbanization. First, the fact that the hybrid matings were successful in producing offspring  
210 indicates no evidence of behavioral prezygotic or intrinsic postzygotic reproductive isolation  
211 among urban and rural populations. It is possible that F2 offspring may exhibit later signs of  
212 reproductive isolation (hybrid inviability or sterility). We also note that male F2 hybrid  
213 incompatibility is unclear from our experimental design and study system as males are haploid  
214 clones of diploid queens, and thus another round of mating (F3) would be required to test this  
215 possibility (Koevoets and Beukeboom 2009). In any case, these are secondary goals of our study.

216 Interestingly, hybrids were more similar to either the rural-rural or urban-urban pure  
217 types depending on whether heat tolerance or cold tolerance was assessed. The heat tolerance of  
218 hybrids more resembled the urban-urban pure type than the rural-rural pure type (Fig. 1A),  
219 whereas the cold tolerance of hybrids more resembled the rural-rural pure type than the urban-  
220 urban pure type (Fig. 1B). This provides further evidence that divergence in thermal tolerance  
221 does not stem from transgenerational plasticity, as the offspring did not consistently resemble a  
222 specific parental population. Moreover, this differential matching of hybrids and pure types

223 across heat and cold tolerance potentially suggests some degree of genetic decoupling of the  
224 traits.

225 We further explored the potential ecological consequences of the differential matching of  
226 hybrid and pure-type heat and cold tolerance phenotypes by computing their tolerance breadth  
227 (difference between colony mean  $CT_{\max}$  and  $CT_{\min}$ ). The likelihood ratio test for the effect of  
228 mating type on tolerance breadth was statistically significant ( $\chi^2 = 9.22$ ;  $P = 0.0266$ ;  $df = 2$ ).  
229 Post-hoc tests revealed that hybrids exhibited greater tolerance breadth than either of the pure  
230 types since the hybrids possessed both the superior heat tolerance value (high  $CT_{\max}$ ) of urban  
231 populations and the superior cold tolerance value (low  $CT_{\min}$ ) of rural populations (Figure 2;  
232 Table 1).

233

## 234 **Discussion**

235 Populations can adaptively respond to rapidly changing environments through  
236 evolutionary change and phenotypic plasticity occurring within or across generations or through  
237 their interaction (Merilä and Hendry 2014; Diamond and Martin 2016). Although distinguishing  
238 among these mechanisms is often difficult, doing so is necessary to understand and predict future  
239 responses to rapid environmental change (Urban et al. 2016). Here we used a multi-generational  
240 common-garden study to discriminate between the effects of transgenerational plasticity and the  
241 effects of evolutionary change. We explored this question in context of the adaptive divergence  
242 of thermal tolerance traits between urban and rural populations of the acorn ant *Temnothorax*  
243 *curvispinosus*. We found no evidence that transgenerational plasticity contributed to divergence  
244 between urban and rural populations in thermal tolerance, as shifts towards better heat tolerance  
245 and worse cold tolerance in urban populations were maintained over two generations in a

246 common-garden laboratory environment. Further, we found that thermal tolerance traits were not  
247 inherited either maternally or paternally in the hybrid pairings.

248 Our results align with those of the few other studies that have used multi-generation  
249 common garden experiments in the context of thermal tolerance divergence to urban heat islands  
250 (Brans et al. 2017). Yet, the overall importance of transgenerational plasticity for evolutionary  
251 responses to novel environments is far from known. The thermal environment experienced by  
252 parents does appear to adaptively affect the thermal tolerance of their offspring in other contexts  
253 and systems, providing strong examples of anticipatory parental effects (Massamba-N'Siala et al.  
254 2014; Chirgwin et al. 2018). However, a recent comprehensive synthesis of transgenerational  
255 plasticity across taxa and traits found relatively weak effects overall (Uller et al. 2013). Adaptive  
256 transgenerational plasticity in thermal tolerance could therefore prove to be relatively  
257 uncommon, albeit with important exceptions, such as those mentioned above. Alternatively,  
258 previous studies might not have been designed to detect such transgenerational plasticity  
259 effectively, or might not have focused on systems where such effects are expected to evolve  
260 (Burgess and Marshall 2014). This may occur if researchers are not actually manipulating the  
261 aspects of the environment that are most predictive of the conditions offspring will encounter  
262 (Uller 2008; Burgess and Marshall 2014).

263 Is there reason to expect adaptive parental effects to evolve in acorn ants as a response to  
264 the urban heat islands? Perhaps not. Acorn ant dispersal ability is quite limited (Herbers and  
265 Tucker 1986; Prebus 2017), and it is highly unlikely acorn ants could experience urban and rural  
266 temperature environments from one generation to the next. Further, within an acorn ant  
267 generation, workers experience substantial thermal variation over very rapid spatio-temporal  
268 scales, including diurnally within the acorn ant nest environment and spatially as foragers move

269 throughout the landscape. This thermal variability is greater within urban forest patches, and  
270 urban population ants have evolved greater within-generation thermal plasticity to rapid  
271 temperature increases (Diamond et al. 2018b). Consequently, while both temperature means and  
272 variances differ between urban and rural populations, the temporal and spatial scale of this  
273 variation is unlikely to select for adaptive transgenerational effects.

274         Although the primary goal of our experiment was to evaluate transgenerational plasticity  
275 as an alternative explanation for the adaptive divergence in thermal tolerance between urban and  
276 rural *T. curvispinosus* populations, our study is not poised to address the overall presence or  
277 absence of parental effects. That is, we cannot rule out *any* role for transgenerational thermal  
278 plasticity in this system or others, only that it does not appear to explain the urban-rural  
279 divergence in thermal tolerance here. Indeed, because we reared acorn ant colonies under non-  
280 stressful temperatures within our multi-generation common garden experiment, it remains  
281 unclear whether other manipulations of the thermal environment, such as heat stress (Chirgwin et  
282 al. 2018) or seasonal temperature variation (Walsh et al. 2014), could induce transgenerational  
283 effects and whether such effects could have played an initial role in facilitating urban-rural  
284 divergence (Badyaev et al. 2002a,b; Badyaev 2008; Pfennig and Martin 2009, 2010).

285         While we did not find evidence for transgenerational plasticity as an explanation for the  
286 divergence in heat and cold tolerance traits among urban and rural acorn ant populations, the  
287 results of the urban-rural hybrid crosses yielded some surprising insights into the genetic  
288 architecture of acorn ant thermal tolerance. Specifically, our comparisons of heat and cold  
289 tolerance traits between the pure type and hybrid urban-rural crosses revealed that dominant and  
290 recessive alleles appear to underlie heat and cold tolerance traits, rather than being determined as  
291 purely additive traits. We found that both hybrid crosses resemble urban populations in heat

292 tolerance and achieve greater cold tolerances similar to that of rural populations, rather than  
293 exhibiting intermediate phenotypes as would be expected for additive traits (Figure 1, Table 1).  
294 Why might both hybrid crosses express the greater heat tolerance of urban populations *and* the  
295 greater cold tolerance of rural populations? One explanation is that heat tolerance and cold  
296 tolerance are largely determined by different genes, with urban populations contributing a  
297 dominant allele(s) for heat tolerance and rural populations a dominant allele(s) for cold tolerance  
298 (Chown and Nicolson 2004). Alternatively, heat and cold tolerance could share genes with  
299 alternative conditional mutations (Griffiths et al. 2005), resulting in environmentally-dependent  
300 dominance. For example, imagine that urban and rural populations are fixed for different alleles  
301 of a heat shock protein. At low temperatures, the urban allele suffers loss of function and  
302 conversely the rural allele loses function at high temperatures, resulting in temperature-sensitive  
303 dominance. The latter scenario would suggest that the losses of cold tolerance in urban  
304 population could in part, be a correlated response to selection for increased heat tolerance in  
305 urban habitats. However, heat and cold tolerance are not strongly genetically correlated within  
306 colonies (Diamond et al. 2018a) suggesting that they may indeed be determined by separate  
307 genes. This would also correspond to the general findings from *Drosophila* and other ectotherm  
308 systems which show that cold and heat tolerance traits are under independent or semi-  
309 independent genetic control (Hoffmann et al. 2003).

310 Our research provides a case study in how an urban-rural cline in temperature can be  
311 used to explore the mechanisms underlying shifts in thermal tolerance trait values, specifically  
312 disentangling evolutionary change from transgenerational plasticity, and to understand the  
313 genetic architecture underlying these traits. But what else can we gain from such comparisons?  
314 With the growing consensus that evolution can occur in the wild on the scale of human lifetimes

315 (Reznick et al. 2018), cities might also allow us to peer into the early stages of speciation as  
316 differences accumulate among urban and rural populations (Thompson et al. 2018). Indeed, as  
317 *Temnothorax curvispinosus* populations have evolved divergent thermal tolerances in response to  
318 urban heat islands, could this ecologically divergent selection promote speciation as well?  
319 Ecologically divergent environments can promote reproductive isolation in several ways. For  
320 example populations may become reproductively isolated by shifting the timing of reproduction  
321 between them (Rundle and Nosil 2005). In the acorn ant system, the date of peak alate  
322 production is shifted earlier by as much as 30 days in urban populations compared with rural  
323 populations, likely due to the differences in the timing of seasonal temperature cues in rural and  
324 urban habitats (Chick et al. 2019). This phenological shift in reproduction is thus likely to reduce  
325 possibilities for mating between urban and rural populations. In contrast, our laboratory breeding  
326 experiment shows that, given the opportunity, urban and rural alates (*i.e.*, reproductive-caste  
327 offspring) will mate and produce fertile offspring, revealing a lack of both behavioral prezygotic  
328 and intrinsic genetic postzygotic isolating mechanisms. Although, because male alates are  
329 haploid, any male sterility corresponding with Haldane's rule would only be expressed by F2  
330 male hybrids who through recombination, carry alleles from both urban and rural populations  
331 (Koevoets and Beukeboom 2009), which remains to be tested.

332 Ecologically divergent environments can also impose reproductive isolation by selecting  
333 against migrants and/or hybrid offspring (Nosil et al. 2003; Nosil 2004). Local adaptation and  
334 divergent selection between urban and rural thermal environments suggest that acorn ant  
335 migrants would face negative selection pressures in their non-native habitat. Hybrid acorn ant  
336 offspring, in comparison, inherit the combined thermal tolerance of both their parents, with heat  
337 and cold tolerances equaling those of urban and rural populations respectively (Figure 1, Table

338 1). This expanded thermal performance (Figure 2, Table 1) breaks the expectation of  
339 intermediate hybrid fitness for ecological speciation (Rundle and Nosil 2005) and suggests that  
340 hybridization could lead to population collapse rather than population divergence. We then  
341 expect that limited dispersal ability, shifted phenologies, or strong selection against migrants has  
342 enabled the evolutionary divergence between urban and rural populations in light of the  
343 expanded thermal breadth of their hybrid offspring. However, the evidence for any ongoing  
344 speciation between urban and rural population is both preliminary and mixed at this time.

345 In summary, the results from a two-generation common garden rearing experiment  
346 support the conclusion that acorn ants have evolved divergent heat and cold thermal tolerances in  
347 response to the selective agent of the urban heat island in Cleveland, Ohio. Surprisingly, thermal  
348 tolerance appears to be influenced by dominance rather than being a purely additive trait, and  
349 heat and cold tolerance might be determined by separate genes. While urban and rural  
350 populations have also diverged in their reproductive phenology, there is no evidence for other  
351 pre- or postzygotic reproductive isolation between them. *Temnothorax curvispinosus* populations  
352 have also diverged in thermal tolerance along at least one other urbanization gradient (Knoxville,  
353 Tennessee), and it is an open question remaining to be explored whether the genetic architecture,  
354 mating behavior or hybrid success is convergent across this independent selective gradient. As  
355 urban environments provide replicated theaters against which the evolutionary play unfolds,  
356 future work aimed at comparisons of the mechanisms of trait evolution across multiple urban  
357 heat islands could be especially fruitful.



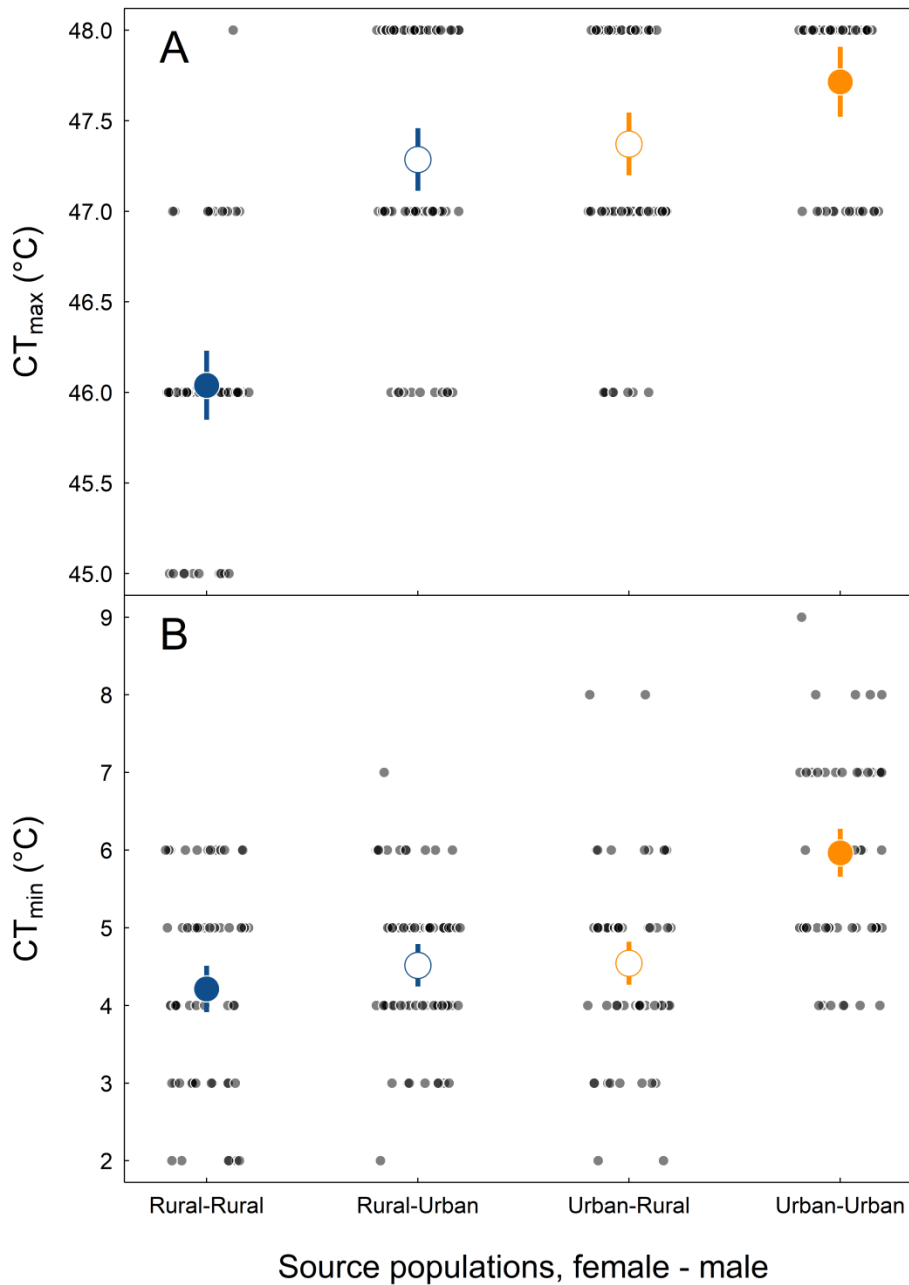

358

359 **Figure 1.** (A) Heat tolerance ( $CT_{max}$ , °C) and (B) cold tolerance ( $CT_{min}$ , °C) as a function of pure  
360 type and hybrid matings across urban and rural acorn ant populations. Small points indicate  
361 tolerance values of individual worker ants from each mating type (with the maternal source  
362 population listed first): rural-rural, rural-urban, urban-rural, and urban-urban. Predicted mean  
363 heat tolerances and standard errors from a linear mixed effects model that accounts for colony-  
364 level autocorrelation are presented in large points (means) and line segments (standard errors).  
365 Pure types are in filled symbols (blue for rural and orange for urban). Open symbols represent  
366 hybrid matings, with the color reflecting the maternal population origin.

367

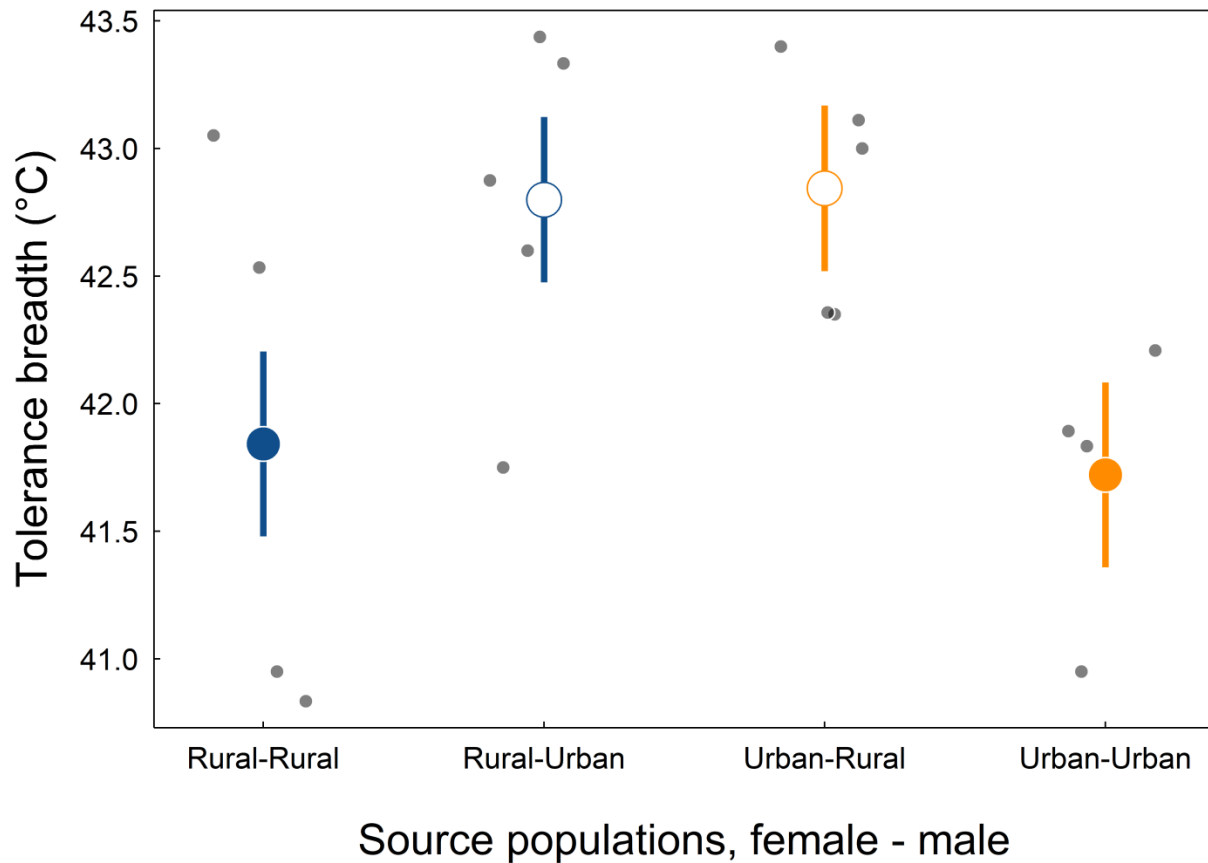

368

369 **Figure 2.** Tolerance breadth (°C) as a function of pure type and hybrid matings across urban and  
370 rural acorn ant populations. Small points indicate tolerance breadth values of whole colonies  
371 (colony mean  $CT_{max}$  - colony mean  $CT_{min}$ ) from each mating type (with the maternal source  
372 population listed first): rural-rural, rural-urban, urban-rural, and urban-urban. Predicted mean  
373 tolerance breadths and standard errors from a generalized linear model are presented in large  
374 points (means) and line segments (standard errors). Pure types are in filled symbols (blue for  
375 rural and orange for urban). Open symbols represent hybrid matings, with the color reflecting the  
376 maternal population origin.

377

378

379

380

381

382

383

384

385

386 **Table 1.** Post-hoc analyses of the mating type term for models of  $CT_{\max}$ ,  $CT_{\min}$ , and tolerance  
 387 breadth are provided including estimates of the contrast, their standard errors and test statistics  
 388 and  $p$ -values for the pairwise differences between factor levels of the mating type term. Note that  
 389 hybrid factor levels are combined for the analysis of tolerance breadth, and that estimates and  
 390 test statistics are reported on the natural log scale. Significant  $p$ -values at the 0.05 level are  
 391 indicated in bold font.

392

| Tolerance type    | Contrast          | Estimate | SE      | Test statistic | $P$             |
|-------------------|-------------------|----------|---------|----------------|-----------------|
| $CT_{\max}$       | rur-rur - rur-urb | -1.25    | 0.257   | -4.84          | <b>0.00132</b>  |
|                   | rur-rur - urb-rur | -1.33    | 0.257   | -5.17          | <b>0.000723</b> |
|                   | rur-rur - urb-urb | -1.67    | 0.272   | -6.17          | <b>0.000128</b> |
|                   | rur-urb - urb-rur | -0.0855  | 0.245   | -0.35          | 0.985           |
|                   | rur-urb - urb-urb | -0.428   | 0.259   | -1.65          | 0.384           |
|                   | urb-rur - urb-urb | -0.343   | 0.26    | -1.32          | 0.566           |
| $CT_{\min}$       | rur-rur - rur-urb | -0.304   | 0.405   | -0.75          | 0.875           |
|                   | rur-rur - urb-rur | -0.331   | 0.408   | -0.813         | 0.848           |
|                   | rur-rur - urb-urb | -1.75    | 0.43    | -4.08          | <b>0.00548</b>  |
|                   | rur-urb - urb-rur | -0.0276  | 0.39    | -0.0709        | 1               |
|                   | rur-urb - urb-urb | -1.45    | 0.412   | -3.51          | <b>0.0161</b>   |
|                   | urb-rur - urb-urb | -1.42    | 0.415   | -3.42          | <b>0.019</b>    |
| Tolerance breadth | hybrid - rur-rur  | 0.0231   | 0.00984 | 2.35           | <b>0.0490</b>   |
|                   | hybrid - urb-urb  | 0.0260   | 0.00986 | 2.64           | <b>0.0225</b>   |
|                   | rur-rur - urb-urb | 0.00290  | 0.0119  | 0.244          | 0.968           |

393

394

395

396

397

398

399

400

401

402

403

404

405 **References**

- 406 Badyaev, A., G. Hill, and L. Whittingham. 2002a. Population consequences of maternal effects:  
407 sex-bias in egg-laying order facilitates divergence in sexual dimorphism between bird  
408 populations. *Journal of Evolutionary Biology* 15:997–1003.
- 409 Badyaev, A. V. 2008. Maternal effects as generators of evolutionary change. *Annals of the New*  
410 *York Academy of Sciences* 1133:151–161.
- 411 Badyaev, A. V., G. E. Hill, M. L. Beck, A. A. Dervan, R. A. Duckworth, K. J. McGraw, P. M.  
412 Nolan, and L. A. Whittingham. 2002b. Sex-biased hatching order and adaptive  
413 population divergence in a passerine bird. *Science* 295:316–318.
- 414 Bernardo, J. 1996. Maternal Effects in Animal Ecology. *Integr Comp Biol* 36:83–105.
- 415 Brans, K. I., M. Jansen, J. Vanoverbeke, N. Tüzün, R. Stoks, and L. D. Meester. 2017. The heat  
416 is on: Genetic adaptation to urbanization mediated by thermal tolerance and body size.  
417 *Global Change Biology* 23:5218–5227.
- 418 Burgess, S. C., and D. J. Marshall. 2014. Adaptive parental effects: the importance of estimating  
419 environmental predictability and offspring fitness appropriately. *Oikos* 123:769–776.
- 420 Chick, L. D., S. A. Strickler, A. Perez, R. A. Martin, and S. E. Diamond. 2019. Urban heat  
421 islands advance the timing of reproduction in a social insect. *Journal of Thermal Biology*  
422 80:119–125.
- 423 Chirgwin, E., D. J. Marshall, C. M. Sgrò, and K. Monro. 2018. How does parental environment  
424 influence the potential for adaptation to global change? *Proceedings of the Royal Society*  
425 *B: Biological Sciences* 285:20181374.
- 426 Chown, S. L., and S. Nicolson. 2004. *Insect Physiological Ecology: Mechanisms and Patterns*.  
427 OUP Oxford.

- 428 Corl, A., K. Bi, C. Luke, A. S. Challa, A. J. Stern, B. Sinervo, and R. Nielsen. 2018. The genetic  
429 basis of adaptation following plastic changes in coloration in a novel environment.  
430 *Current Biology* 28:2970–2977.
- 431 DeWitt, T. J., and S. M. Scheiner. 2004. Phenotypic plasticity: functional and conceptual  
432 approaches. Oxford University Press.
- 433 Diamond, S. E., L. D. Chick, A. Perez, S. A. Strickler, and R. A. Martin. 2018a. Evolution of  
434 thermal tolerance and its fitness consequences: parallel and non-parallel responses to  
435 urban heat islands across three cities. *Proc. Biol. Sci.* 285.
- 436 Diamond, S. E., L. D. Chick, A. Perez, S. A. Strickler, and C. Zhao. 2018b. Evolution of  
437 plasticity in the city: urban acorn ants can better tolerate more rapid increases in  
438 environmental temperature. *Conserv Physiol* 6.
- 439 Diamond, S. E., L. Chick, A. Perez, S. A. Strickler, and R. A. Martin. 2017. Rapid evolution of  
440 ant thermal tolerance across an urban-rural temperature cline. *Biol J Linn Soc* 121:248–  
441 257.
- 442 Diamond, S. E., and R. A. Martin. 2016. The interplay between plasticity and evolution in  
443 response to human-induced environmental change. *F1000Research* 5.
- 444 Diamond, S. E., C. A. Penick, S. L. Pelini, A. M. Ellison, N. J. Gotelli, N. J. Sanders, and R. R.  
445 Dunn. 2013. Using Physiology to Predict the Responses of Ants to Climatic Warming.  
446 *Integr Comp Biol* 53:965–974.
- 447 Donelson, J. M., S. Salinas, P. L. Munday, and L. N. S. Shama. 2018. Transgenerational  
448 plasticity and climate change experiments: Where do we go from here? *Global Change*  
449 *Biology* 24:13–34.

- 450 Donihue, C. M., and M. R. Lambert. 2015. Adaptive evolution in urban ecosystems. *Ambio*  
451 44:194–203.
- 452 Ghalambor, C. K., J. K. McKAY, S. P. Carroll, and D. N. Reznick. 2007. Adaptive versus non-  
453 adaptive phenotypic plasticity and the potential for contemporary adaptation in new  
454 environments. *Functional Ecology* 21:394–407.
- 455 Gorton, A. J., D. A. Moeller, and P. Tiffin. 2018. Little plant, big city: a test of adaptation to  
456 urban environments in common ragweed (*Ambrosia artemisiifolia*). *Proceedings of the*  
457 *Royal Society B: Biological Sciences* 285:20180968.
- 458 Griffiths, A. J., S. R. Wessler, R. C. Lewontin, W. M. Gelbart, D. T. Suzuki, J. H. Miller, and  
459 others. 2005. *An introduction to genetic analysis*. Macmillan.
- 460 Herbers, J. M. 1990. Reproductive Investment and Allocation Ratios for the Ant *Leptothorax*  
461 *longispinosus*: Sorting Out the Variation. *The American Naturalist* 136:178–208.
- 462 Herbers, J. M., and C. W. Tucker. 1986. Population Fluidity in *Leptothorax Longispinosus*  
463 (Hymenoptera: Formicidae).
- 464 Hoffmann, A. A., J. G. Sørensen, and V. Loeschcke. 2003. Adaptation of *Drosophila* to  
465 temperature extremes: bringing together quantitative and molecular approaches. *Journal*  
466 *of Thermal Biology* 28:175–216.
- 467 Imhoff, M. L., P. Zhang, R. E. Wolfe, and L. Bounoua. 2010. Remote sensing of the urban heat  
468 island effect across biomes in the continental USA. *Remote Sensing of Environment*  
469 114:504–513.
- 470 Johnson, M. T. J., and J. Munshi-South. 2017. Evolution of life in urban environments. *Science*  
471 358.

- 472 Kelly, M. 2019. Adaptation to climate change through genetic accommodation and assimilation  
473 of plastic phenotypes. *Philosophical Transactions of the Royal Society B* 374:20180176.
- 474 Koevoets, T., and L. W. Beukeboom. 2009. Genetics of postzygotic isolation and Haldane’s rule  
475 in haplodiploids. *Heredity* 102:16–23.
- 476 Lenth, R. 2018. emmeans: Estimated Marginal Means, aka Least-Squares Means.
- 477 Levis, N. A., A. J. Isdaner, and D. W. Pfennig. 2018. Morphological novelty emerges from pre-  
478 existing phenotypic plasticity. *Nature ecology & evolution* 2:1289.
- 479 Levis, N. A., and D. W. Pfennig. 2016. Evaluating “plasticity-first” evolution in nature: key  
480 criteria and empirical approaches. *Trends in ecology & evolution* 31:563–574.
- 481 Marshall, D. J., and T. Uller. 2007. When is a maternal effect adaptive? *Oikos* 116:1957–1963.
- 482 Massamba-N’Siala, G., D. Prevedelli, and R. Simonini. 2014. Trans-generational plasticity in  
483 physiological thermal tolerance is modulated by maternal pre-reproductive environment  
484 in the polychaete *Ophryotrocha labronica*. *Journal of Experimental Biology* 217:2004–  
485 2012.
- 486 Merilä, J., and A. P. Hendry. 2014. Climate change, adaptation, and phenotypic plasticity: the  
487 problem and the evidence. *Evolutionary Applications* 7:1–14.
- 488 Mousseau, T. A., and C. W. Fox. 1998. The adaptive significance of maternal effects. *Trends*  
489 *Ecol. Evol. (Amst.)* 13:403–407.
- 490 Nosil, P. 2004. Reproductive isolation caused by visual predation on migrants between divergent  
491 environments. *Proceedings of the Royal Society of London. Series B: Biological*  
492 *Sciences* 271:1521–1528.

- 493 Nosil, P., B. J. Crespi, and C. P. Sandoval. 2003. Reproductive isolation driven by the combined  
494 effects of ecological adaptation and reinforcement. *Proceedings of the Royal Society of*  
495 *London. Series B: Biological Sciences* 270:1911–1918.
- 496 Pfennig, D. W., and R. A. Martin. 2009. A maternal effect mediates rapid population divergence  
497 and character displacement in spadefoot toads. *Evolution: International Journal of*  
498 *Organic Evolution* 63:898–909.
- 499 Pfennig, D. W., and R. A. Martin. 2010. Evolution of character displacement in spadefoot toads:  
500 different proximate mechanisms in different species. *Evolution: International Journal of*  
501 *Organic Evolution* 64:2331–2341.
- 502 Pinheiro, J., D. Bates, S. DebRoy, D. Sarkar, and R Core Team. 2018. *nlme: Linear and*  
503 *Nonlinear Mixed Effects Models*.
- 504 Prebus, M. 2017. Insights into the evolution, biogeography and natural history of the acorn ants,  
505 genus *Temnothorax* Mayr (hymenoptera: Formicidae). *BMC Evolutionary Biology*  
506 17:250.
- 507 Price, T. D., A. Qvarnström, and D. E. Irwin. 2003. The role of phenotypic plasticity in driving  
508 genetic evolution. *Proceedings of the Royal Society of London. Series B: Biological*  
509 *Sciences* 270:1433–1440.
- 510 R Core Team. 2018. *R: A Language and Environment for Statistical Computing*. R Foundation  
511 for Statistical Computing, Vienna, Austria.
- 512 Reznick, D. N., J. Losos, and J. Travis. 2018. From low to high gear: there has been a paradigm  
513 shift in our understanding of evolution. *Ecol. Lett.*, doi: 10.1111/ele.13189.
- 514 Rivkin, L. R., J. S. Santangelo, M. Alberti, M. F. J. Aronson, C. W. de Keyzer, S. E. Diamond,  
515 M.-J. Fortin, L. J. Frazee, A. J. Gorton, A. P. Hendry, Y. Liu, J. B. Losos, J. S. MacIvor,



- 516 R. A. Martin, M. J. McDonnell, L. S. Miles, J. Munshi-South, R. W. Ness, A. E. M.  
517 Newman, M. R. Stothart, P. Theodorou, K. A. Thompson, B. C. Verrelli, A. Whitehead,  
518 K. M. Winchell, and M. T. J. Johnson. 2019. A roadmap for urban evolutionary ecology.  
519 *Evolutionary Applications* 12:384–398.
- 520 Rundle, H. D., and P. Nosil. 2005. Ecological speciation. *Ecology Letters* 8:336–352.
- 521 Stuart, R. J., L. Gresham-Bissett, and T. M. Alloway. 1993. Queen adoption in the polygynous  
522 and polydomous ant, *Leptothorax curvispinosus*. *Behav Ecol* 4:276–281.
- 523 Terblanche, J. S., A. A. Hoffmann, K. A. Mitchell, L. Rako, P. C. le Roux, and S. L. Chown.  
524 2011. Ecologically relevant measures of tolerance to potentially lethal temperatures.  
525 *Journal of Experimental Biology* 214:3713–3725.
- 526 Thompson, K. A., L. H. Rieseberg, and D. Schluter. 2018. Speciation and the City. *Trends in*  
527 *Ecology & Evolution* 33:815–826.
- 528 Uller, T. 2008. Developmental plasticity and the evolution of parental effects. *Trends Ecol. Evol.*  
529 *(Amst.)* 23:432–438.
- 530 Uller, T., S. Nakagawa, and S. English. 2013. Weak evidence for anticipatory parental effects in  
531 plants and animals. *J. Evol. Biol.* 26:2161–2170.
- 532 Urban, M. C., G. Bocedi, A. P. Hendry, J.-B. Mihoub, G. Pe'er, A. Singer, J. R. Bridle, L. G.  
533 Crozier, L. D. Meester, W. Godsoe, A. Gonzalez, J. J. Hellmann, R. D. Holt, A. Huth, K.  
534 Johst, C. B. Krug, P. W. Leadley, S. C. F. Palmer, J. H. Pantel, A. Schmitz, P. A. Zollner,  
535 and J. M. J. Travis. 2016. Improving the forecast for biodiversity under climate change.  
536 *Science* 353:aad8466.
- 537 Walsh, M. R., D. Whittington, and C. Funkhouser. 2014. Thermal Transgenerational Plasticity in  
538 Natural Populations of *Daphnia*. *Integr Comp Biol* 54:822–829.

539 West-Eberhard, M. J. 2003. Developmental plasticity and evolution. Oxford University Press.

540 Winchell, K. M., R. G. Reynolds, S. R. Prado-Irwin, A. R. Puente-Rolón, and L. J. Revell.

541 2016. Phenotypic shifts in urban areas in the tropical lizard *Anolis cristatellus*. *Evolution*

542 70:1009–1022.

543

544

545

546

547

548

549

550

551

552

553

554

555

556

557

558

559

560

561

562 **Supporting Information**

563 **Table S1.** Geographic coordinates and percent developed impervious surface area (ISA) values  
 564 (0% ISA indicates rural sites, 40-50% ISA indicates urban sites) of acorn ant collection sites.

| Site name                       | Longitude | Latitude | Source environment | ISA |
|---------------------------------|-----------|----------|--------------------|-----|
| University Farm                 | -81.4245  | 41.49842 | Rural              | 0   |
| Holden Arboretum                | -81.3127  | 41.6088  | Rural              | 0   |
| Ambler Park                     | -81.6055  | 41.4976  | Urban              | 40  |
| Case Western Reserve University |           |          |                    | 49  |
| Forest Hills                    | -81.6137  | 41.50897 | Urban              |     |
|                                 | -81.5737  | 41.52751 | Urban              | 44  |

565

566 **Table S2.** Number of individual worker ants tested for  $CT_{min}$  and  $CT_{max}$  per each colony. The  
 567 type of cross (the two hybrids and two pure types) is also indicated with the maternal source  
 568 population listed first.

| Cross   | Number of individuals tested for $CT_{max}$ | Number of individuals tested for $CT_{min}$ |
|---------|---------------------------------------------|---------------------------------------------|
| rur-rur | 15                                          | 15                                          |
| rur-rur | 12                                          | 12                                          |
| rur-rur | 13                                          | 12                                          |
| rur-rur | 20                                          | 20                                          |
| rur-urb | 16                                          | 16                                          |
| rur-urb | 16                                          | 16                                          |
| rur-urb | 24                                          | 24                                          |
| rur-urb | 6                                           | 5                                           |
| rur-urb | 10                                          | 10                                          |
| urb-rur | 20                                          | 10                                          |
| urb-rur | 11                                          | 11                                          |
| urb-rur | 10                                          | 10                                          |
| urb-rur | 14                                          | 14                                          |
| urb-rur | 9                                           | 9                                           |
| urb-urb | 11                                          | 9                                           |
| urb-urb | 8                                           | 7                                           |
| urb-urb | 24                                          | 24                                          |
| urb-urb | 12                                          | 12                                          |

569
